# Supplementary material for: Neuropathological changes and cognitive deficits in rats transgenic for human mutant tau recapitulate human tauopathy
Source: PubMed Central journal article supplement (PMC6597947; doi:10.1016/j.nbd.2019.03.018), 2019-07
Supplement: mmc1.pdf [file mmc1.pdf]

## **Supplementary Material**

**Neuropathological changes and cognitive deficits in rats transgenic for human mutant tau recapitulate human tauopathy**

Janice C. Malcolm, Lionel Breuillaud, Sonia Do Carmo, H el ene Hall, Lindsay A. Welikovitch, Jennifer A. Macdonald, Michel Goedert, A. Claudio Cuello

**Supplementary table 1.** *List of primary and secondary antibodies used and their applications*

| Antibody                                          | Epitope/target                                             | Supplier        | App.            | Conc.    | Secondary Antibody               | Conc.  | Supplier      |
|---------------------------------------------------|------------------------------------------------------------|-----------------|-----------------|----------|----------------------------------|--------|---------------|
| <b>Conformational Tau</b>                         |                                                            |                 |                 |          |                                  |        |               |
| MC1                                               | aa 7-9; aa 312-322                                         | Peter Davies    | IHC             | 1:500    | Goat anti-mouse IgG              | 1:200  | MP biomedical |
|                                                   |                                                            |                 | EM              | 1:10     | 10nm gold-conjugated anti-mouse  | 1:50   | BBI Solutions |
| <b>Phosphorylated Tau</b>                         |                                                            |                 |                 |          |                                  |        |               |
| AT100                                             | Thr <sup>212</sup> /Ser <sup>214</sup> /Thr <sup>217</sup> | Thermofisher    | WB <sup>S</sup> | 1:1000   | HRP conjugated goat anti-mouse   | 1:5000 | Bio-Rad       |
|                                                   |                                                            |                 | EM <sup>S</sup> | 1:50     | 10nm gold-conjugated anti-mouse  | 1:50   | BBI Solutions |
| AT270                                             | Thr <sup>181</sup>                                         | Thermofisher    | EM <sup>S</sup> | 1:50     | 10nm gold-conjugated anti-rabbit | 1:50   | BBI Solutions |
| AT8                                               | Ser <sup>202</sup> /Thr <sup>205</sup>                     | Thermofisher    | IHC             | 1:500    | Goat anti-mouse IgG              | 1:200  | MP biomedical |
|                                                   |                                                            |                 | EM              | 1:100    | 1.4nm gold-conjugated anti-mouse | 1:200  | Nanogold      |
|                                                   |                                                            |                 | EM <sup>S</sup> | 1:50     | 10nm gold-conjugated anti-mouse  | 1:50   | BBI Solutions |
| AT180                                             | Ser <sup>231</sup>                                         | Thermofisher    | IHC             | 1:500    | Goat anti-mouse IgG              | 1:200  | MP biomedical |
|                                                   |                                                            |                 | EM <sup>S</sup> | 1:50     | 10nm gold-conjugated anti-mouse  | 1:50   | BBI Solutions |
| CP13                                              | Ser <sup>202</sup>                                         | Peter Davies    | IHC             | 1:2000   | Goat anti-mouse IgG              | 1:200  | MP biomedical |
|                                                   |                                                            |                 | EM <sup>S</sup> | 1:50     | 10nm gold-conjugated anti-rabbit | 1:50   | BBI Solutions |
| PHF-1                                             | Ser <sup>396/404</sup>                                     | Peter Davies    | IHC             | 1:4000   | Goat anti-mouse IgG              | 1:200  | MP biomedical |
|                                                   |                                                            |                 | EM <sup>S</sup> | 1:50     | 10nm gold-conjugated anti-rabbit | 1:50   | BBI Solutions |
| <b>Tau Epitopes (phosphorylation independent)</b> |                                                            |                 |                 |          |                                  |        |               |
| BR133                                             | N-terminus                                                 | Goedert lab     | WB <sup>S</sup> | 1:4000   | HRP-conjugated anti-rabbit IgG   | 1:4000 | Bio-Rad       |
|                                                   |                                                            |                 | EM <sup>S</sup> | 1:50     | 10nm gold-conjugated anti-rabbit | 1:50   | BBI Solutions |
| BR134                                             | C-terminus                                                 | Goedert lab     | WB <sup>S</sup> | 1:4000   | HRP-conjugated anti-rabbit IgG   | 1:4000 | Bio-Rad       |
|                                                   |                                                            |                 | EM <sup>S</sup> | 1:50     | 10nm gold-conjugated anti-rabbit | 1:50   | BBI Solutions |
| RD3                                               | 3R tau                                                     | Merck Millipore | WB              | 1:2000   | HRP-conjugated anti-mouse IgG    | 1:5000 | Bio-Rad       |
| RD4                                               | R2, 4R tau                                                 | Merck Millipore | WB <sup>S</sup> | 1:2000   | HRP-conjugated anti-mouse IgG    | 1:5000 | Bio-Rad       |
| <b>Rodent Tau</b>                                 |                                                            |                 |                 |          |                                  |        |               |
| T49                                               | Rodent tau                                                 | Merck Millipore | IHC             | 1:2500   | Goat anti-mouse IgG              | 1:200  | MP biomedical |
|                                                   |                                                            |                 | WB <sup>S</sup> | 1:50000  | HRP-conjugated anti-mouse IgG    | 1:5000 | Bio-Rad       |
|                                                   |                                                            |                 | EM <sup>S</sup> | 1:50     | 10nm gold-conjugated anti-rabbit | 1:50   | BBI Solutions |
|                                                   |                                                            |                 | IF              | 1:4000   | Alexa Fluor 568                  | 1:400  | Thermofisher  |
| <b>Total Tau (human)</b>                          |                                                            |                 |                 |          |                                  |        |               |
| HT7                                               | Human tau;<br>aa 159-163                                   | Thermofisher    | IHC             | 1:1500   | Goat anti-mouse IgG              | 1:200  | MP biomedical |
|                                                   |                                                            |                 | IF              | 1:750    | Alexa Fluor 488/Alexa Fluor 568  | 1:400  | Thermofisher  |
|                                                   |                                                            |                 | WB <sup>S</sup> | 1:2000   | HRP-conjugated anti-mouse IgG    | 1:5000 | Bio-Rad       |
| <b>Other</b>                                      |                                                            |                 |                 |          |                                  |        |               |
| Iba1                                              | Microglia/<br>Macrophages                                  | Wako            | IHC             | 1:2000   | Biotinylated goat anti-rabbit    | 1:200  | Vector labs   |
| NeuN                                              | Neuronal nuclei                                            | Abcam           | IHC             | 1:2000   | Goat anti-mouse IgG              | 1:200  | MP biomedical |
| GFAP                                              | Astrocytes                                                 | Novus           | IF              | 1:2000   | Alexa Fluor 488                  | 1:400  | Thermofisher  |
| DAPI                                              | Nuclei                                                     | Sigma           | IF              | 1:200000 | N/A                              | N/A    | N/A           |
| GAPDH                                             | GAPDH                                                      | Merck Millipore | WB              | 1:10000  | HRP-conjugated anti-mouse IgG    | 1:5000 | Bio-Rad       |

Amino acids (aa); Application (App.); Concentration (Conc.); Horse-radish peroxidase (HRP); Western blot (WB); Immunohistochemistry (IHC); Immunofluorescence (IF); Electron microscopy (EM); 3 repeat (3R); 4 repeat (4R); Repeat 1 (R1); Repeat 2 (R2); Repeat 3 (R3); Repeat 4(R4); <sup>s</sup> Sarkosyl preparations

**Supplementary table 2. Statistical output**

|                                              | Mean   |        | SEM  |       | p-value | Degrees of freedom | Test statistic | Statistical test used            |
|----------------------------------------------|--------|--------|------|-------|---------|--------------------|----------------|----------------------------------|
|                                              | WT     | R962   | WT   | R962  |         |                    |                |                                  |
| <b>18-20 month-old cohort</b>                |        |        |      |       |         |                    |                |                                  |
| <i>Volumetric analysis</i>                   |        |        |      |       |         |                    |                |                                  |
| Ventricle volume (AP-0.75 to -1.75)          | 0.03   | 1.10   | 0.02 | 0.36  | 0.0013  | 14                 | W = 1          | Mann-Whitney                     |
| Ventricle volume (AP 2.3 to 4.16)            | 0.50   | 6.04   | 0.11 | 1.30  | 0.0003  | 14                 | W = 0          | Mann-Whitney                     |
| <i>Ventricle volume (Log transformed)</i>    |        |        |      |       |         |                    |                |                                  |
| Genotype                                     |        |        |      |       | <0.0001 | 1                  | f = 47.04      | Two-way ANOVA                    |
| Sex                                          |        |        |      |       | NS      | 1                  | f = 1.64       |                                  |
| Genotype:Sex                                 |        |        |      |       | NS      | 1                  | f = 0.523      |                                  |
| Brain volume (AP-0.75 to -1.75)              | 40.05  | 33.45  | 0.92 | 1.16  | 0.0005  | 14                 | t = 4.46       | Independent t-test               |
| Dorsal hippocampus volume                    | 6.71   | 5.22   | 0.19 | 0.34  | 0.0057  | 14                 | t = 3.83       | Independent t-test               |
| <i>NeuN positive neuron count</i>            |        |        |      |       |         |                    |                |                                  |
| CA1 neurons (avg per FOV)                    | 126.1  | 97.0   | 2.8  | 3.6   | <0.0001 | 15                 | t = 5.92       | Independent t-test               |
| CA1 neurons (avg per section)                | 525.8  | 338.8  | 23.0 | 25.0  | <0.0001 | 15                 | t = 5.52       | Independent t-test               |
| CA2 neurons (avg per FOV)                    | 97.2   | 66.7   | 3.1  | 4.5   | <0.0001 | 15                 | t = 5.43       | Independent t-test               |
| <i>Iba1 positive microglia</i>               |        |        |      |       |         |                    |                |                                  |
| Subiculum microglia (avg per FOV)            | 62.2   | 271.6  | 3.5  | 30.8  | 0.0002  | 13                 | t = 6.76       | Welch's t-test <sup>BH</sup>     |
| CA1 microglia (avg per FOV)                  | 45.0   | 217.8  | 2.8  | 18.7  | 0.0008  | 13                 | t = 9.13       | Welch's t-test <sup>BH</sup>     |
| Hilus microglia (avg per FOV)                | 56.2   | 202.3  | 6.7  | 17.5  | 0.0008  | 13                 | t = 7.81       | Welch's t-test <sup>BH</sup>     |
| <i>Astrocyte immunofluorescence</i>          |        |        |      |       |         |                    |                |                                  |
| Astrocyte CA1 (total fluorescence)           | 85.03  | 205.57 | 4.75 | 13.80 | <0.0001 | 8.6                | t = 8.26       | Welch's t-test <sup>BH</sup>     |
| Astrocyte dentate gyrus (total fluorescence) | 106.20 | 189.20 | 7.32 | 5.49  | <0.0001 | 12                 | t = 9.07       | Welch's t-test <sup>BH</sup>     |
| Astrocyte CA1 (fluorescence area)            | 21.13  | 24.64  | 0.36 | 0.43  | <0.0001 | 14                 | t = 6.28       | Independent t-test <sup>BH</sup> |
| Astrocyte dentate gyrus (fluorescence area)  | 22.32  | 24.16  | 0.31 | 0.28  | 0.0007  | 14                 | t = 4.32       | Independent t-test <sup>BH</sup> |
| <b>Behavioural testing</b>                   |        |        |      |       |         |                    |                |                                  |
| <i>Novel object</i>                          |        |        |      |       |         |                    |                |                                  |
| Open field (percent time on edge)            | 74.41  | 80.26  | 2.67 | 3.09  | NS      | 22                 | t = 1.38       | Independent t-test               |
| Familiarisation - object exploration (s)     | 32.31  | 36.22  | 1.80 | 4.37  | NS      | 22                 | t = 0.97       | Independent t-test               |
| Novel object location (%)                    | 32.58  | 19.49  | 2.28 | 3.59  | 0.0037  | 22                 | t = 3.24       | Independent t-test               |
| Novel object recognition (%)                 | 44.74  | 23.48  | 1.85 | 3.66  | <0.0001 | 22                 | t = 5.80       | Independent t-test               |
| <i>Morris water maze</i>                     |        |        |      |       |         |                    |                |                                  |
| <i>Morris water maze training</i>            |        |        |      |       |         |                    |                | Mixed design ANOVA               |
| Genotype                                     |        |        |      |       | 0.032   | 1                  | f = 5.26       |                                  |
| Training day                                 |        |        |      |       | <0.0001 | 4                  | f = 11.12      |                                  |
| Genotype:Training day                        |        |        |      |       | 0.034   | 4                  | f = 2.72       |                                  |
| Latency to platform - day 1                  | 69.68  | 74.09  | 9.03 | 7.97  | NS      | 21                 | t = 0.32       | Independent t-test <sup>BH</sup> |
| Latency to platform - day 2                  | 56.75  | 52.45  | 4.35 | 6.98  | NS      | 21                 | t = 0.55       | Independent t-test <sup>BH</sup> |
| Latency to platform - day 3                  | 37.73  | 55.42  | 4.75 | 7.12  | 0.045   | 21                 | t = 2.13       | Independent t-test <sup>BH</sup> |
| Latency to platform - day 4                  | 34.59  | 47.97  | 4.28 | 7.49  | NS      | 21                 | t = 1.68       | Independent t-test <sup>BH</sup> |
| Latency to platform - day 5                  | 30.34  | 62.64  | 2.92 | 7.52  | 0.002   | 21.0               | t = 3.27       | Independent t-test <sup>BH</sup> |
| Probe trial - latency to platform zone       | 24.78  | 36.90  | 5.71 | 6.90  | NS      | 21                 | t = 1.30       | Independent t-test               |
| Entry frequency into platform zone           | 0.93   | 0.38   | 0.25 | 0.26  | NS      | 21                 | t = 0.59       | Independent t-test               |
| <i>Fear conditioning (freezing %)</i>        |        |        |      |       |         |                    |                |                                  |
| Habituation (baseline freezing)              | 65.25  | 53.08  | 9.81 | 12.36 | NS      | 21                 | t = 0.77       | Independent t-test               |
| Fear conditioning - baseline                 | 19.00  | 15.01  | 3.53 | 5.55  | NS      | 21                 | t = 0.64       | Independent t-test <sup>BH</sup> |
| Fear conditioning - tone                     | 14.57  | 11.39  | 4.20 | 4.65  | NS      | 21                 | t = 0.49       | Independent t-test <sup>BH</sup> |
| Fear conditioning - post-shock               | 59.68  | 15.33  | 5.87 | 3.36  | <0.0001 | 19.5               | t = 6.55       | Welch's t-test <sup>BH</sup>     |
| Contextual recall                            | 72.00  | 28.06  | 5.57 | 6.60  | <0.0001 | 21                 | t = 5.03       | Independent t-test               |
| Cued recall - baseline                       | 12.77  | 9.13   | 2.60 | 3.62  | 0.412   | 21                 | t = 0.84       | Independent t-test               |
| Cued recall - tone (avg)                     | 75.63  | 23.27  | 5.83 | 9.52  | 0.0002  | 21                 | t = 4.98       | Independent t-test <sup>BH</sup> |

| Cued recall - pause (avg)                    | 73.60 | 38.32 | 8.47  | 7.94  | 0.009   | 21                 | t = 2.85       | Independent t-test <sup>BH</sup> |
|----------------------------------------------|-------|-------|-------|-------|---------|--------------------|----------------|----------------------------------|
| <b>Beam walking test</b>                     |       |       |       |       |         |                    |                |                                  |
| Footslips                                    | 0.38  | 0.42  | 0.15  | 0.14  | NS      | 20                 | t = 0.16       | Independent t-test               |
| Latency to goal box (s)                      | 7.66  | 8.93  | 1.14  | 2.18  | NS      | 20                 | t = 0.57       | Independent t-test               |
| <hr/>                                        |       |       |       |       |         |                    |                |                                  |
|                                              | Mean  |       | SEM   |       | p-value | Degrees of freedom | Test statistic | Statistical test used            |
|                                              | WT    | R962  | WT    | R962  |         |                    |                |                                  |
| <b>10 month-old cohort</b>                   |       |       |       |       |         |                    |                |                                  |
| <b>NeuN positive neuron count</b>            |       |       |       |       |         |                    |                |                                  |
| CA1 neurons (avg. per FOV)                   | 121.2 | 121   | 2.3   | 3.1   | NS      | 12                 | t = 0.04       | Independent t-test               |
| CA2 neurons (avg. per FOV)                   | 96.5  | 94.5  | 2.4   | 5.4   | NS      | 12                 | t = 0.36       | Independent t-test               |
| <b>Iba1 positive microglia</b>               |       |       |       |       |         |                    |                |                                  |
| Subiculum microglia (avg. per FOV)           | 59.7  | 60.2  | 11.3  | 4.9   | NS      | 8                  | t = 0.04       | Welch's t-test <sup>BH</sup>     |
| CA1 microglia (avg. per FOV)                 | 60.8  | 47.5  | 6.6   | 3.7   | NS      | 12                 | t = 1.76       | Independent t-test <sup>BH</sup> |
| Hilus microglia (avg. per FOV)               | 54.3  | 49    | 9.2   | 12.6  | NS      | 12                 | t = 0.34       | Independent t-test <sup>BH</sup> |
| <b>Astrocyte immunofluorescence</b>          |       |       |       |       |         |                    |                |                                  |
| Astrocyte CA1 (total fluorescence)           | 218.5 | 210.5 | 15.67 | 23.18 | NS      | 13                 | t = 0.14       | Independent t-test <sup>BH</sup> |
| Astrocyte dentate gyrus (total fluorescence) | 159   | 161.9 | 15.99 | 12.91 | NS      | 13                 | t = 0.29       | Independent t-test <sup>BH</sup> |
| Astrocyte CA1 (fluorescence area)            | 23.58 | 22.98 | 0.30  | 0.31  | NS      | 13                 | t = 1.37       | Independent t-test <sup>BH</sup> |
| Astrocyte dentate gyrus (fluorescence area)  | 23.6  | 23.18 | 0.28  | 0.43  | NS      | 13                 | t = 1.84       | Independent t-test <sup>BH</sup> |
| <b>Behavioural testing</b>                   |       |       |       |       |         |                    |                |                                  |
| <b>Novel object</b>                          |       |       |       |       |         |                    |                |                                  |
| Open field (percent time on edge)            | 91.82 | 94.48 | 2.26  | 1.42  | NS      | 20                 | t = 0.85       | Independent t-test               |
| Familiarisation - object exploration (s)     | 33.43 | 34.38 | 1.37  | 2.72  | NS      | 20                 | t = 0.35       | Independent t-test               |
| Novel object location (%)                    | 25.43 | 26.38 | 1.59  | 2.78  | NS      | 20                 | t = 0.80       | Independent t-test               |
| Novel object recognition (%)                 | 32.43 | 33.27 | 4.8   | 7.12  | NS      | 20                 | t = 0.15       | Independent t-test               |
| <b>Morris water maze</b>                     |       |       |       |       |         |                    |                |                                  |
| <i>Morris water maze training</i>            |       |       |       |       |         |                    |                | Mixed design                     |
| Genotype                                     |       |       |       |       | NS      | 1                  | f = 0.98       | ANOVA                            |
| Training day                                 |       |       |       |       | <0.0001 | 4                  | f = 32.91      |                                  |
| Genotype:Training day                        |       |       |       |       | NS      | 4                  | f = 0.44       |                                  |
| Latency to platform - day 1                  | 67.98 | 62.31 | 10.94 | 11.88 | NS      | 18                 | t = 0.33       | Independent t-test <sup>BH</sup> |
| Latency to platform - day 2                  | 60.59 | 59.64 | 9.83  | 15.68 | NS      | 18                 | t = 0.05       | Independent t-test <sup>BH</sup> |
| Latency to platform - day 3                  | 41.72 | 34.44 | 8.49  | 7.64  | NS      | 18                 | t = 0.56       | Independent t-test <sup>BH</sup> |
| Latency to platform - day 4                  | 27.28 | 23.24 | 7.06  | 6.65  | NS      | 18                 | t = 0.37       | Independent t-test <sup>BH</sup> |
| Latency to platform - day 5                  | 31.34 | 20.46 | 6.76  | 5.37  | NS      | 18                 | t = 1.07       | Independent t-test <sup>BH</sup> |
| Probe trial - latency to platform zone       | 29.96 | 28.8  | 6.33  | 8.89  | NS      | 18                 | t = 0.11       | Independent t-test               |
| Entry frequency into platform zone           | 1.5   | 1.71  | 0.33  | 0.49  | NS      | 18                 | t = 0.37       | Independent t-test               |
| <b>Fear conditioning (freezing %)</b>        |       |       |       |       |         |                    |                |                                  |
| Habituation (baseline freezing)              | 15.72 | 35.29 | 2.91  | 8.03  | NS      | 7.6                | t = 2.29       | Welch's t-test <sup>BH</sup>     |
| Fear conditioning - baseline                 | 18.89 | 28.74 | 5.07  | 6.99  | NS      | 12                 | t = 1.69       | Independent t-test <sup>BH</sup> |
| Fear conditioning - tone                     | 14.63 | 27.7  | 3.38  | 8.62  | NS      | 12                 | t = 1.14       | Independent t-test <sup>BH</sup> |
| Fear conditioning - post-shock               | 57.05 | 65.08 | 7.51  | 6.3   | NS      | 12                 | t = 0.71       | Independent t-test <sup>BH</sup> |
| Contextual recall                            | 58    | 66.14 | 8.58  | 10.4  | NS      | 12                 | t = 0.58       | Independent t-test               |
| Cued recall - baseline                       | 11.59 | 15.83 | 2.91  | 1.85  | NS      | 12                 | t = 1.01       | Independent t-test <sup>BH</sup> |
| Cued recall - tone (avg)                     | 52.27 | 54.04 | 6.17  | 14.63 | NS      | 12                 | t = 0.13       | Independent t-test <sup>BH</sup> |
| Cued recall - pause (avg)                    | 13.55 | 14.05 | 2.27  | 4.04  | NS      | 12                 | t = 0.12       | Independent t-test <sup>BH</sup> |

<sup>BH</sup> Bonferroni-Holm correction (multiple comparison test); average (avg); field of view (FOV); not significant (NS); seconds (s); standard error of the mean (SEM); R962-hTau (R962); wildtype (WT)

### Timepoints investigated

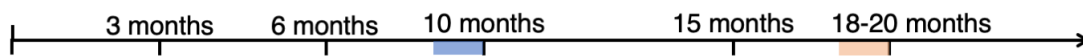

### Behavioural Paradigms

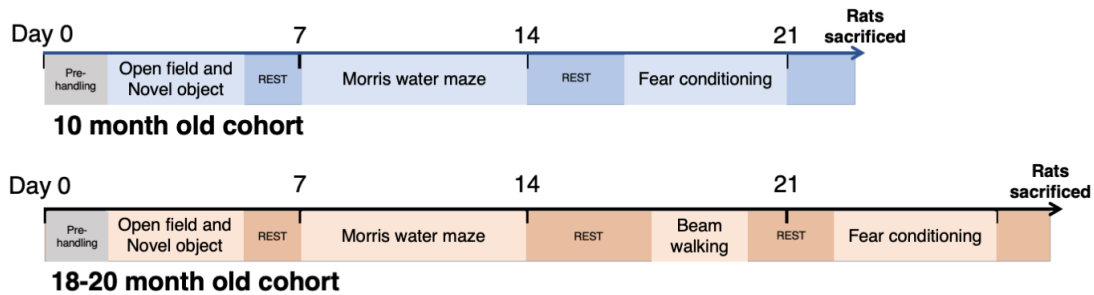

### Supplementary Figure 1. *Timeline of behavioural investigations*

Behaviour was investigated in R962-hTau and WT rats, with rats sacrificed at 10 or 18-20 months after behavioural study completion. Rats were handled for at least of two days prior to behavioural testing commencing (pre-handling: day 0-2), before completing open field, novel object, Morris water maze and fear conditioning tasks. Additionally, old rats were tested for motor and coordination deficits using the beam walking test prior to fear conditioning. Rats were given 2-4 days rest between tasks. All rats were sacrificed within 4 days of behavioural testing completion.

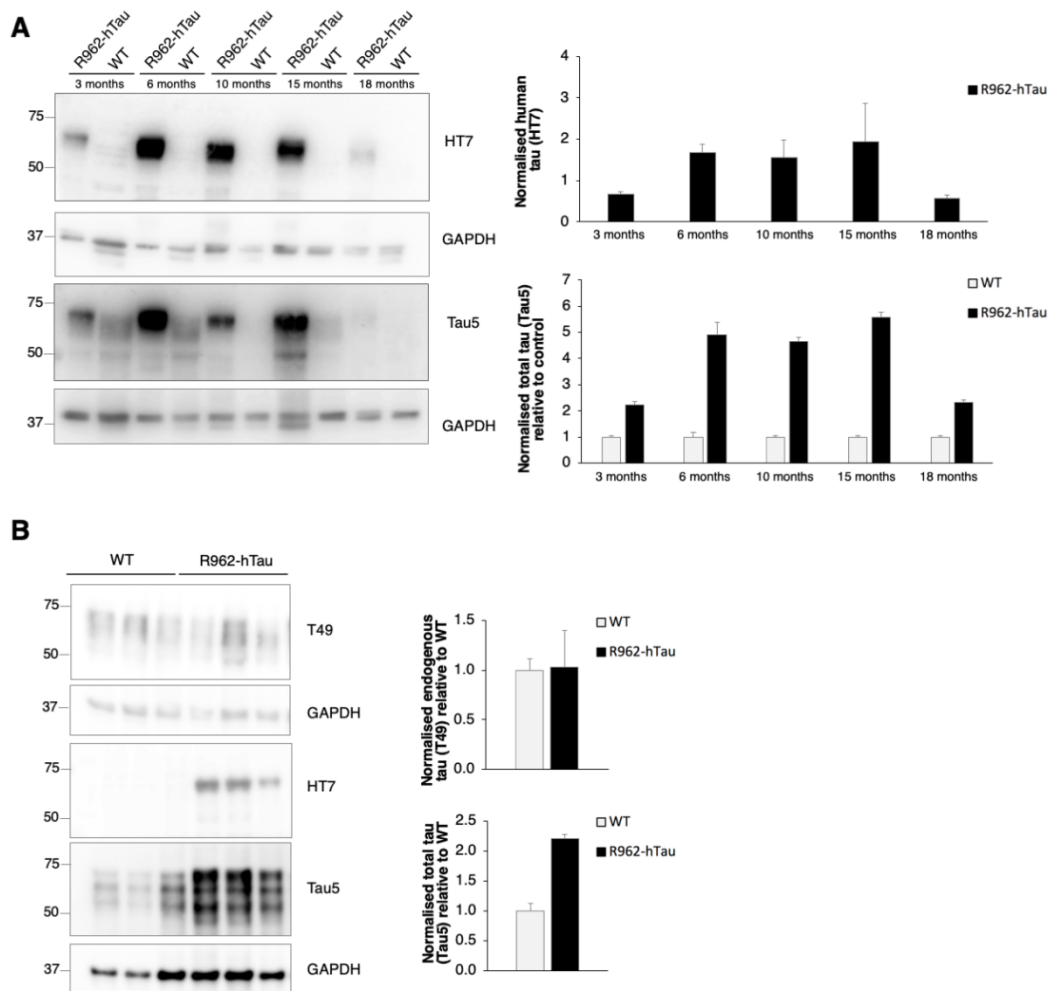

**Supplementary Figure 2.** *Western blotting of endogenous, human and total tau.*

(A) Western blots and quantification of human tau (HT7) and total tau (Tau5) levels in hippocampal homogenates across investigated timepoints (3, 6, 10, 15 and 18-20 months) ( $n = 3/\text{group}$ ). (B) Western blots of 3-month-old WT control and R962-hTau whole cortex homogenates demonstrate increase in total tau levels (Tau5) is attributable to the presence of human tau (HT7) in the transgenic rats, as no obvious effect was observed on endogenous rodent tau levels (T49) between control and R962-hTau rats ( $n = 3/\text{group}$ ). HT7, Tau5 and T49 immunoreactivity values are normalised to GAPDH levels. In addition, Tau5 and T49 levels are normalised to age-matched WT littermate levels.

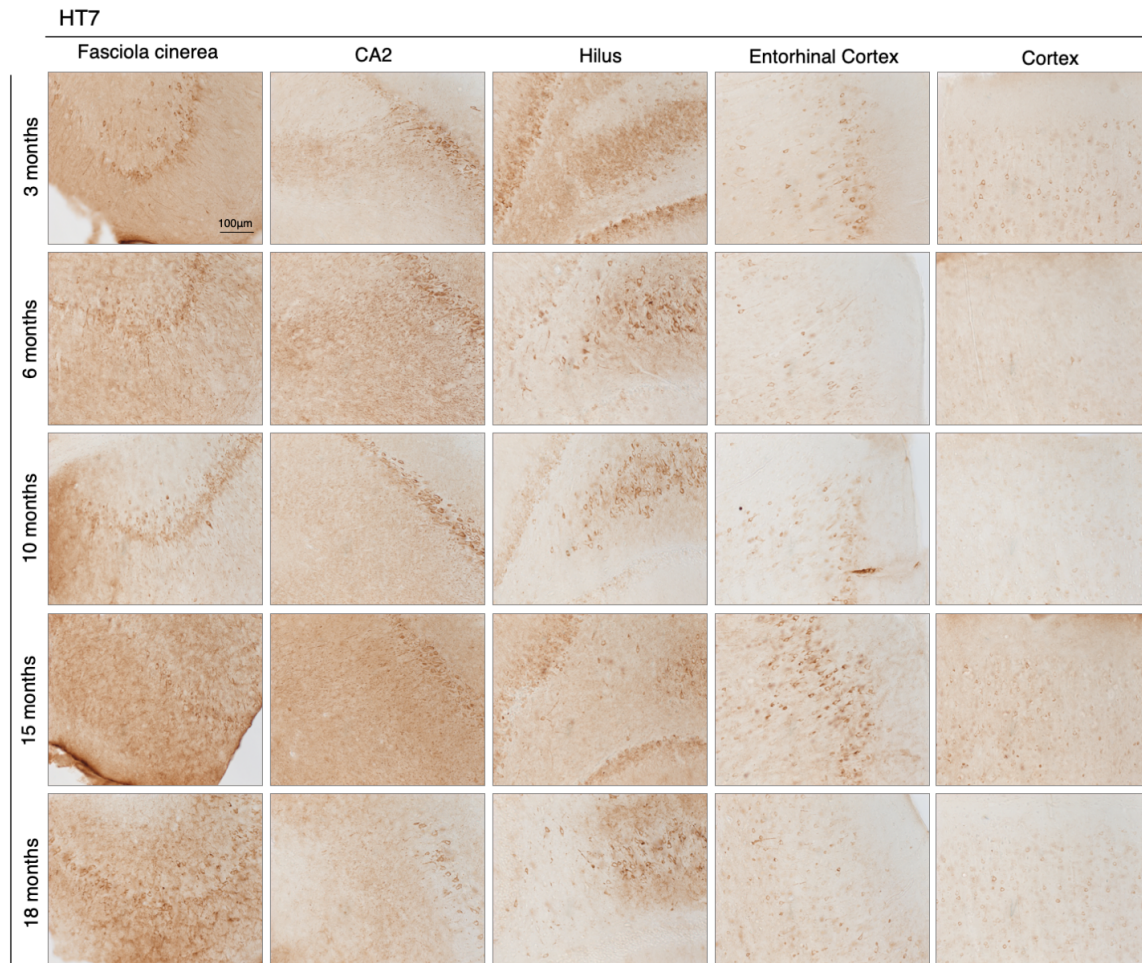

**Supplementary Figure 3.** *HT7-immunoreactivity progression throughout hippocampal and cortical regions*

Spatiotemporal progression of HT7-immunoreactivity through hippocampal areas (fasciola cinerea, CA2, hilus of the dentate gyrus) as well as cortical areas (lateral entorhinal cortex and upper piriform cortex, and the somatosensory cortex layers I-III) [ $n = 3-4$  (3, 6, 15 months); 8-9 (10 and 18-20 months)].

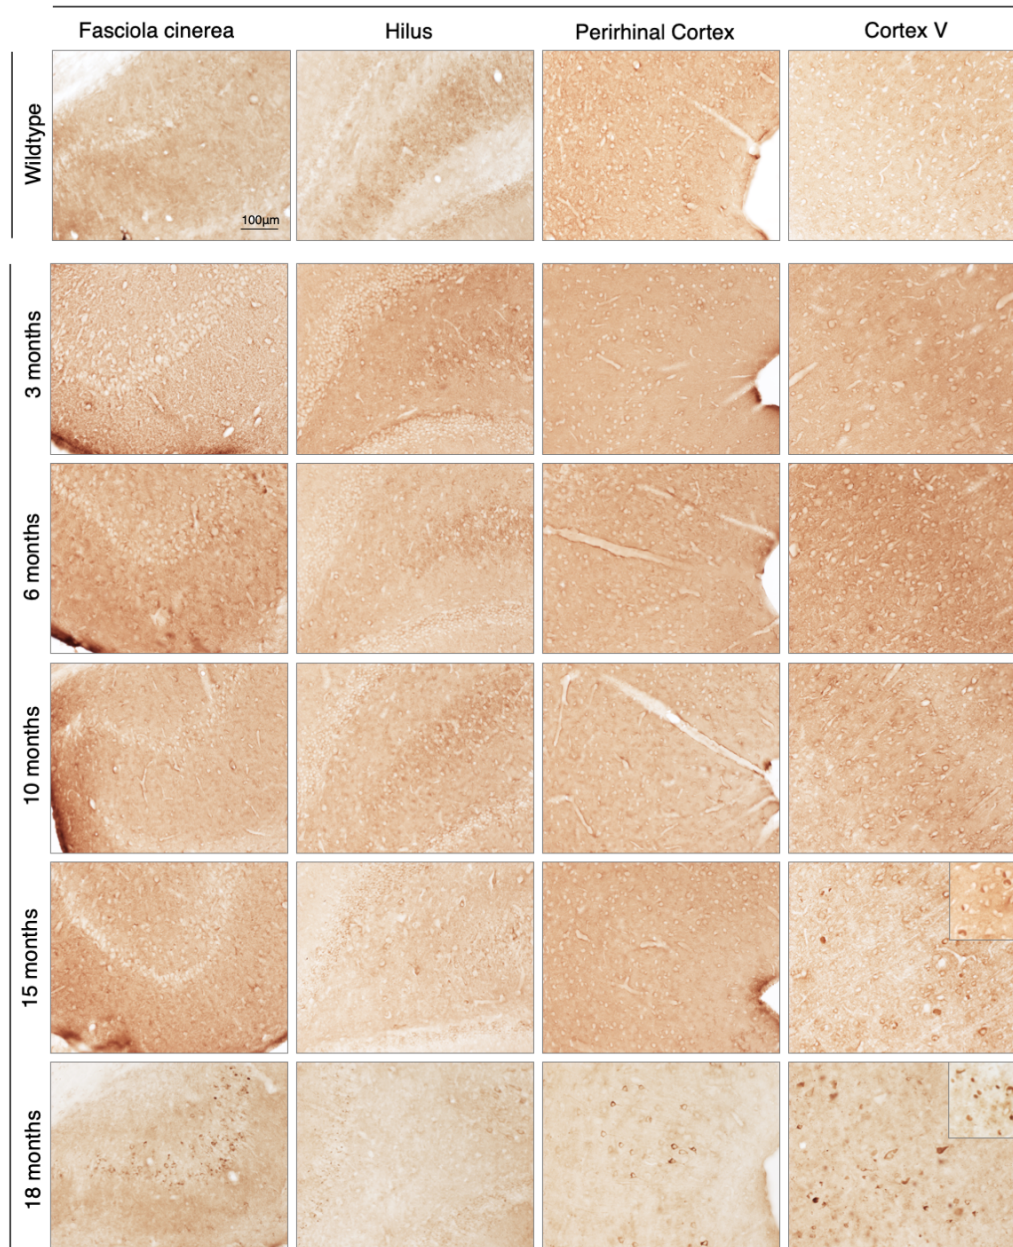

**Supplementary Figure 4.** *Endogenous tau recruitment throughout hippocampal and cortical regions*

Spatiotemporal progression of T49-immunoreactivity through hippocampal areas (fasciola cinerea, CA2, hilus of the dentate gyrus) as well as cortical areas (perirhinal cortex and somatosensory cortex layer V, insets layers I-III) reveals extensive endogenous tau recruitment to overt neuronal pathologies is a relatively late occurrence [ $n = 3-4$  (3,6,15 months); 8-9 (10 and 18-20 months)].



## AT8

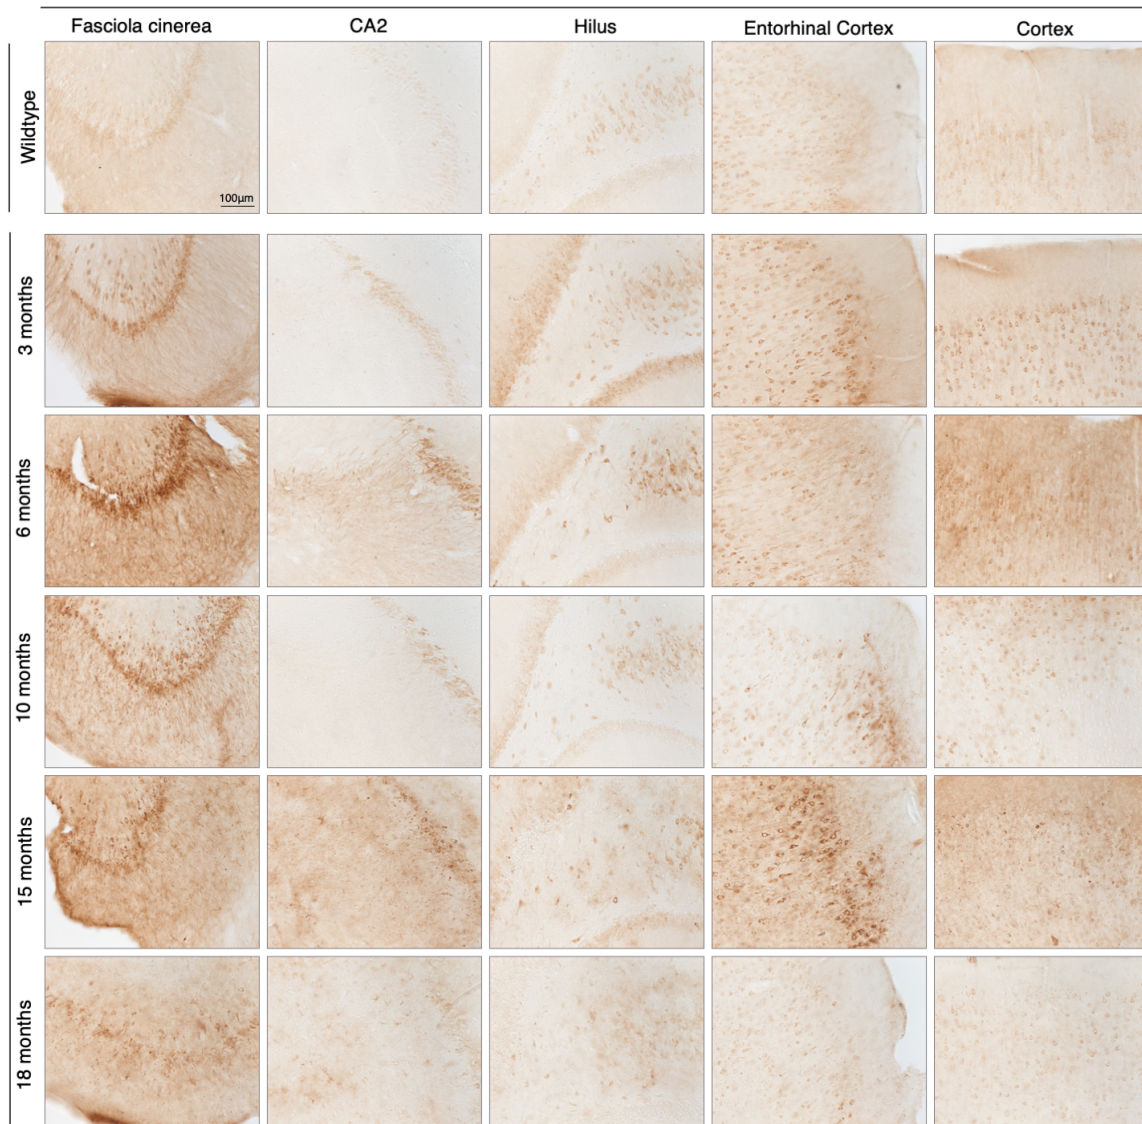

**Supplementary Figure 5.** *AT8-immunoreactivity progression throughout hippocampal and cortical regions*

Spatiotemporal progression of AT8-immunoreactivity through hippocampal areas (fasciola cinerea, CA2, hilus of the dentate gyrus) as well as cortical areas (lateral entorhinal cortex and upper piriform cortex, and the somatosensory cortex layers I-III) [ $n = 3-4$  (3,6,15 months); 8-9 (10 and 18-20 months)].

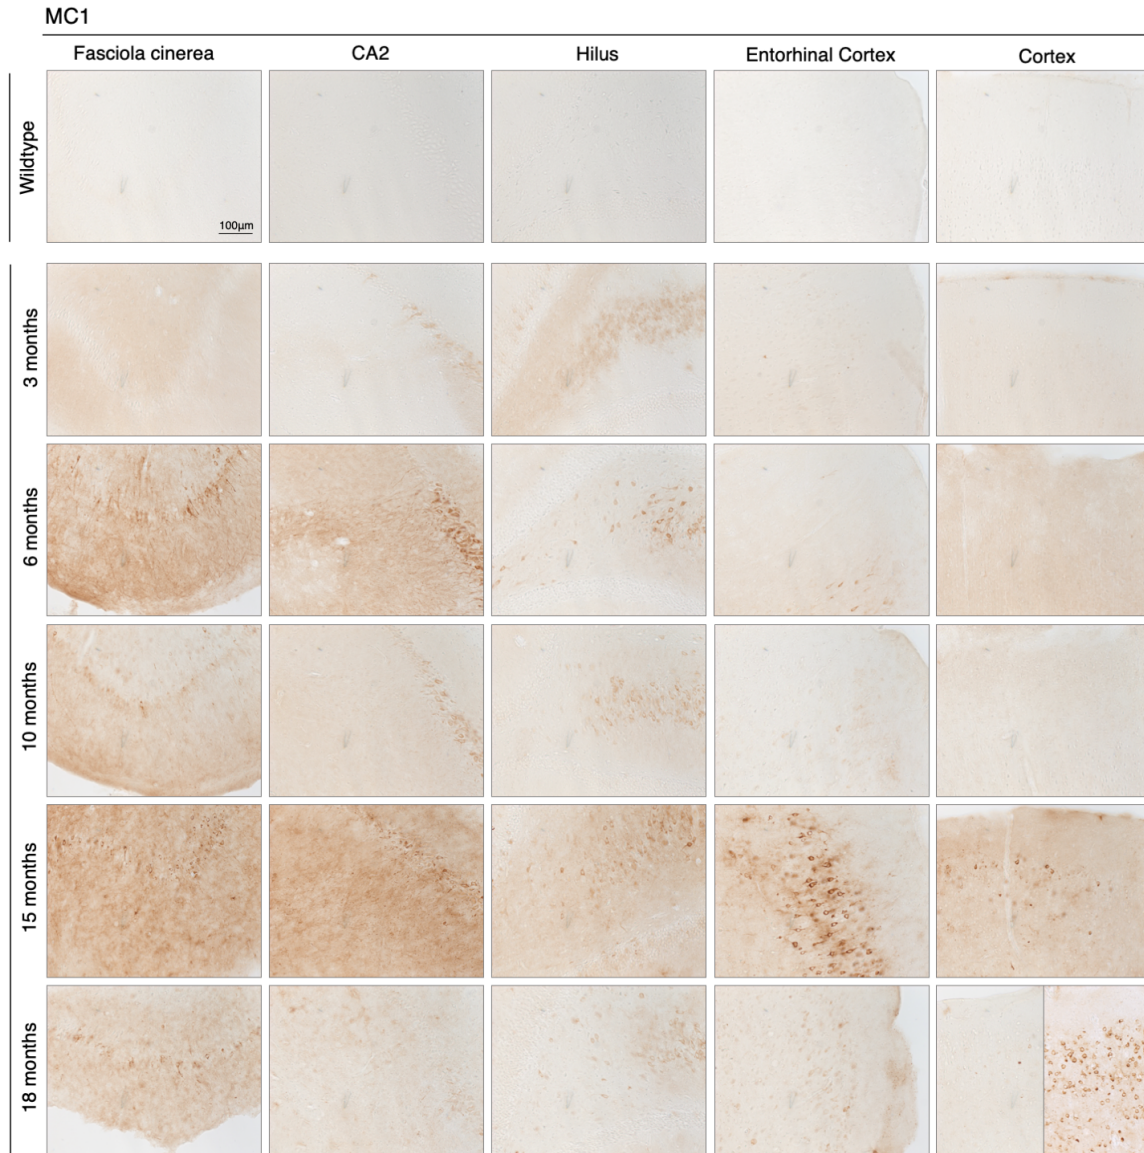

**Supplementary Figure 6.** *MC1-immunoreactivity progression throughout hippocampal and cortical regions*

Spatiotemporal progression of MC1-immunoreactivity through hippocampal areas (fasciola cinerea, CA2, hilus of the dentate gyrus) as well as cortical areas (lateral entorhinal cortex and upper piriform cortex, and the somatosensory cortex layers I-III) [ $n = 3-4$  (3,6,15 months); 8-9 (10 and 18-20 months)].

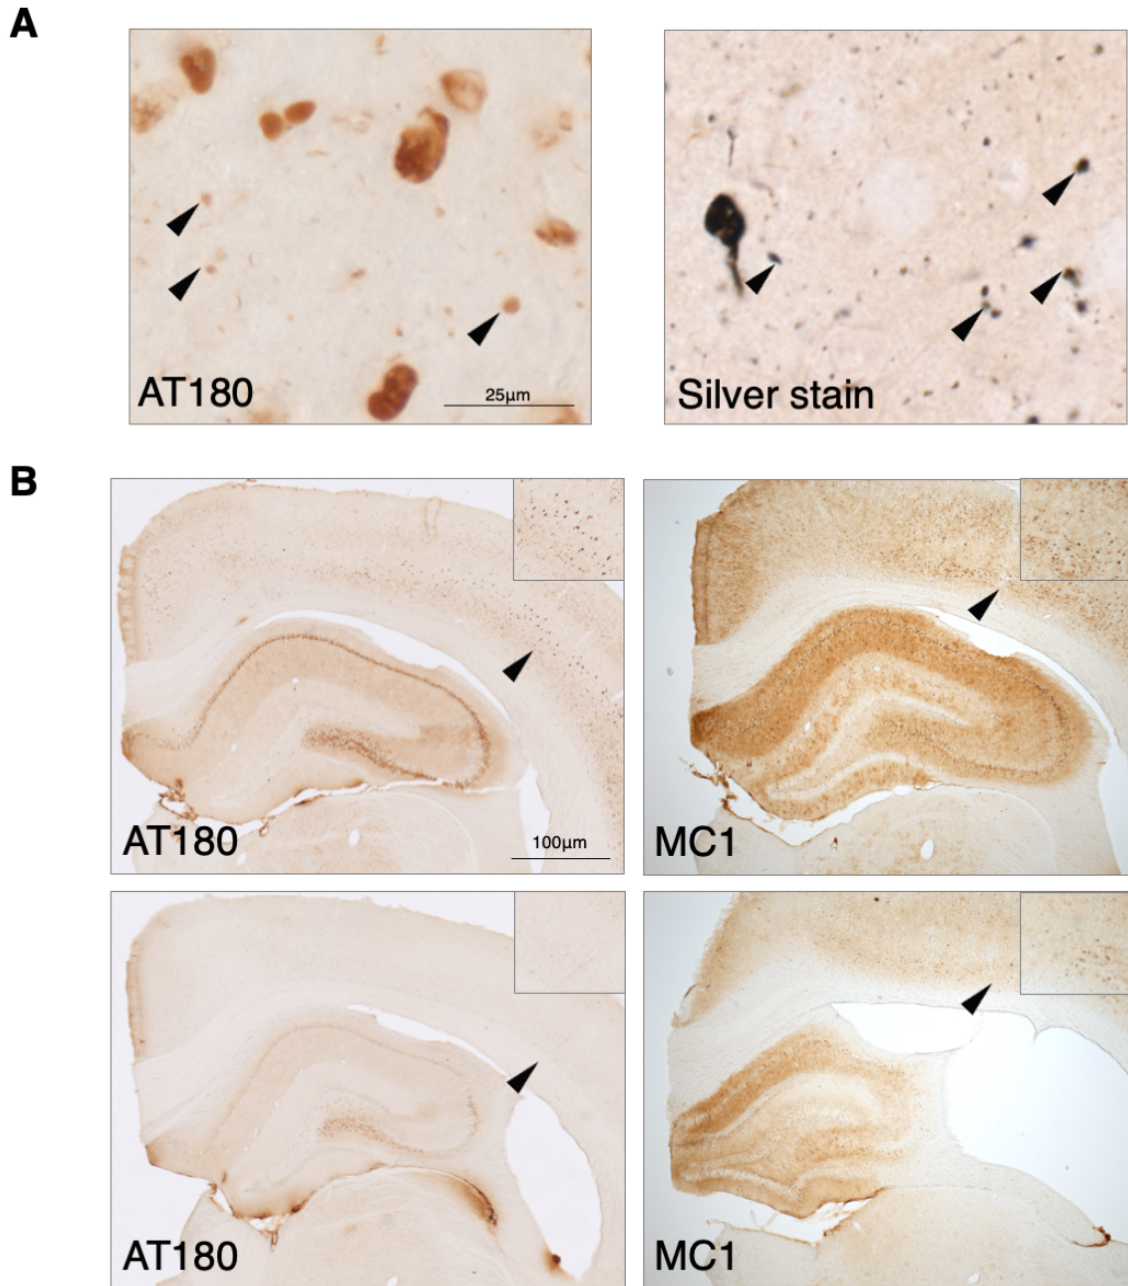

**Supplementary Figure 7.** *Presence of axonal spheroids and variability between staining patterns in R962-hTau rats*

(A) Presence of axonal spheroids and pick like bodies visualized using the antibody AT180 (arrows) ( $n=7-9/\text{group}$ ), and axonal spheroids and neuronal aggregates viewed with a Bielschowsky silver stain (arrows) ( $n=2/\text{group}$ ). (B) Variability between rats in tau distribution and immunoreactivity are present. At 18 months of age, one rat (top left) is seen to have numerous AT180-immunoreactivity inclusions throughout the cortex, while these are virtually absent in another rat of the same age and sex (bottom left). Similarly, differences in

MC1-immunoreactivity intensity and inclusions differ between two more examples. Extreme differences can also be observed in terms of hippocampal atrophy and lateral dilation, highlighting the diversity observed with rats with the same genetic background, carrying the same mutation. Insets 70 $\mu$ m across.

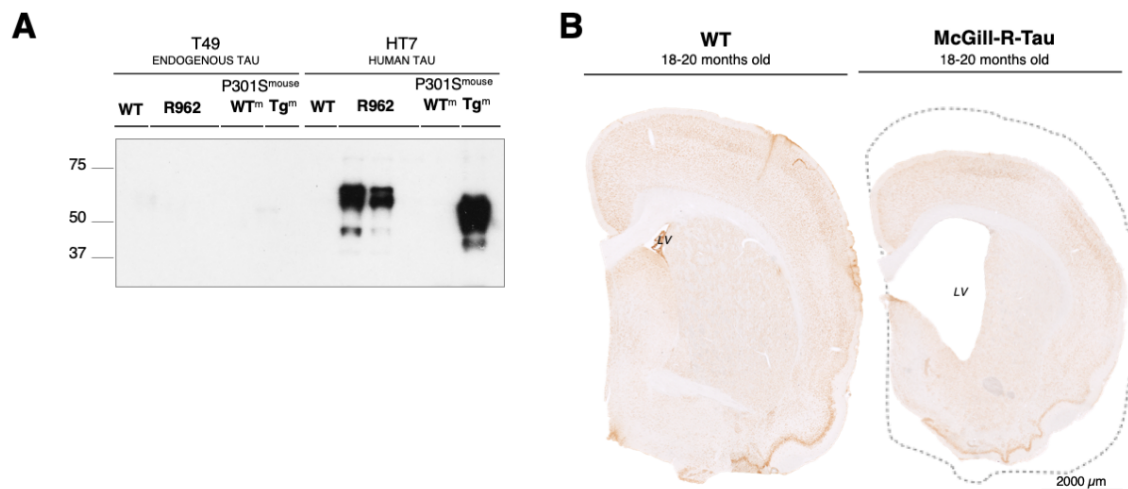

**Supplementary Figure 8.** *Western blotting of tau species and rostral degeneration.*

(A) 10 month old sarkosyl preparations predominately consist of human tau, with no significant endogenous tau recruitment at this time point ( $n = 4/\text{group}$ ). (B) The rostral lateral ventricle of a 18-20-month-old R962-hTau rat with gross atrophy of cortical tissue and extensive lateral ventricle (LV) dilation compared to control ( $n = 7-9/\text{group}$ ).

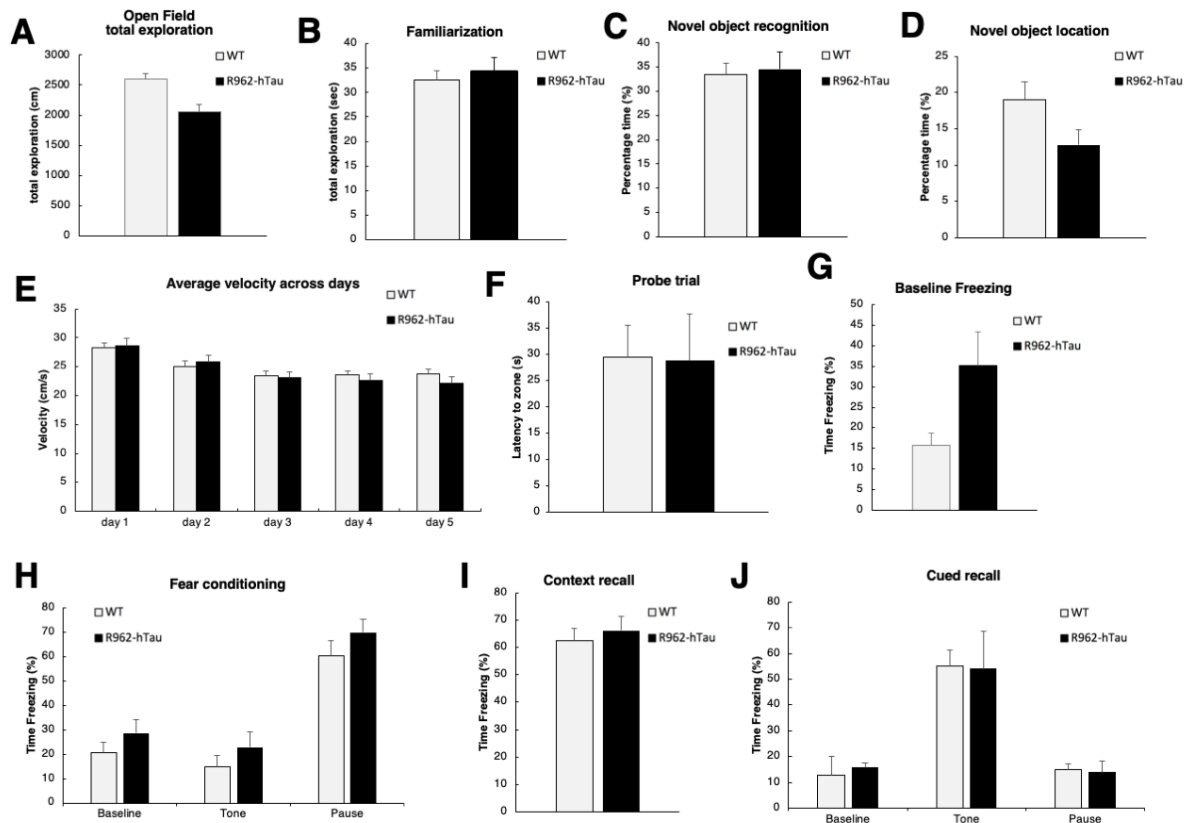

**Supplementary Figure 9.** 10 month old behaviour analysis in R962-hTau rats reveal no deficits

During the open field task, total exploration was investigated (distance travelled) (A), with subsequent tests revealing no overt differences in total exploration time during familiarisation (B), novel object recognition (C) or novel object location tasks (D) at the 10 month time point ( $n = 14$  WT; 8 R962-hTau). The Morris water maze task revealed no differences in neither swim speed between control and transgenic rats (E), nor cognitive deficits in the probe trial (F) ( $n = 13$  WT; 8 R962-hTau). In the fear conditioning task ( $n = 9$  WT; 5 R962-hTau), there were no differences between genotypes in time spent freezing at baseline (G) and during the conditioning (H), contextual recall (I) and cued recall phases (J).

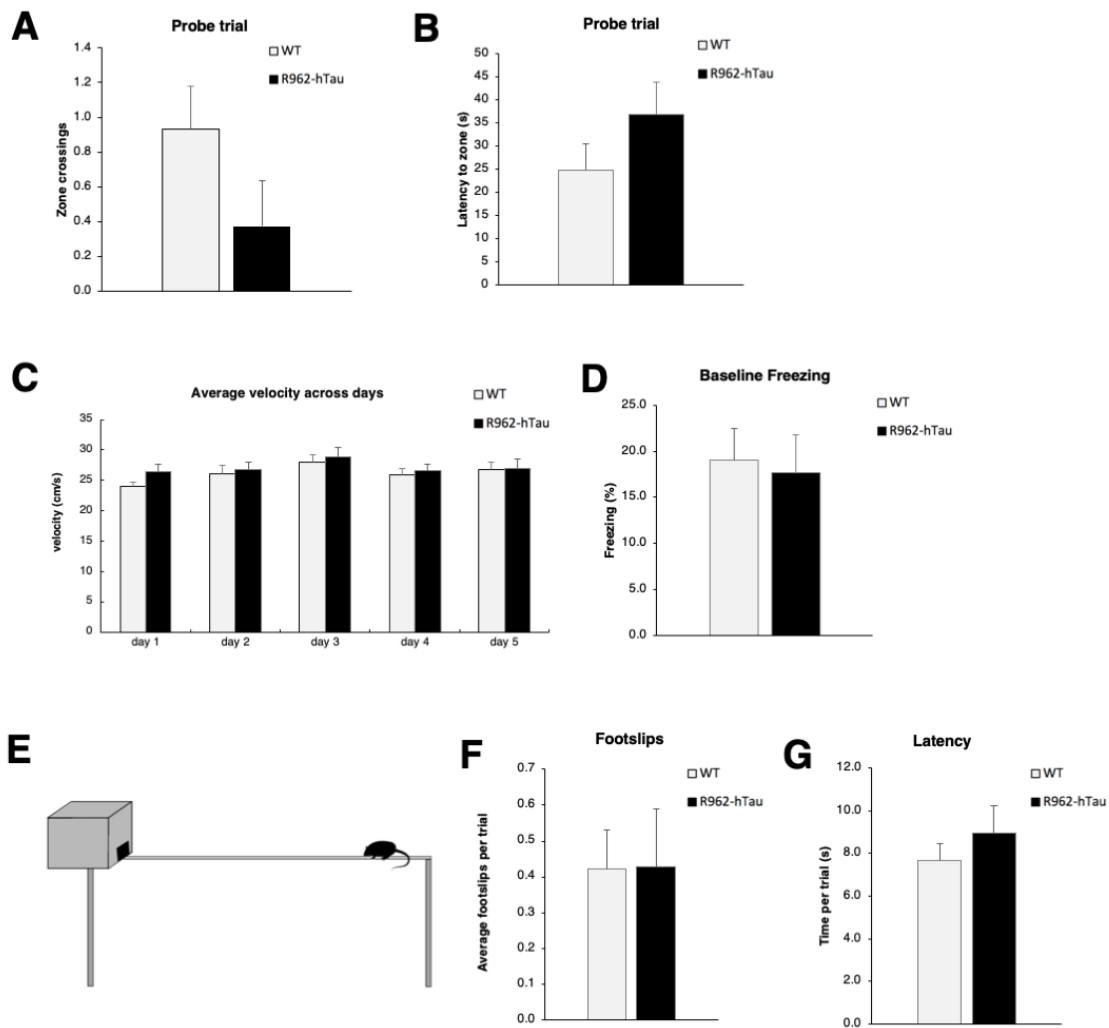

**Supplementary Figure 10. Behavioural tasks and motor coordination at 18-20-months of age**

The Morris water maze probe trial did reach a statistically difference between genotypes in terms of zone crossings (A) or latency to reach zone (B). Swimming velocity is similar in 18-20 month old R962-hTau and WT rats (C). There was no difference observed in baseline freezing during fear conditioning (D). Beam walking test (E) demonstrate no motor deficits in 18-20 months old R962-hTau rats, as determined by number of footslips (F) and latency to reach box (G) ( $n = 14-16$  WT;  $7-9$  R962-hTau/group).

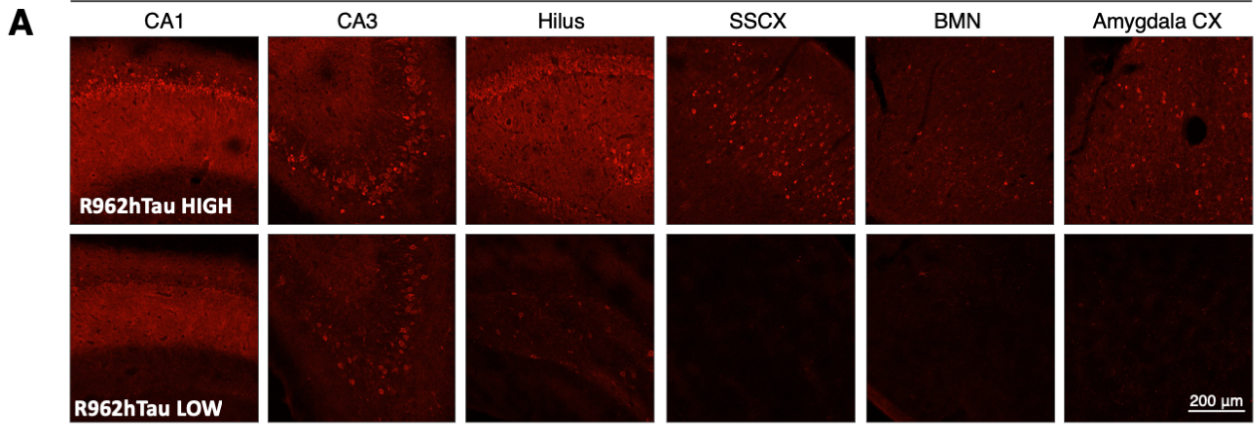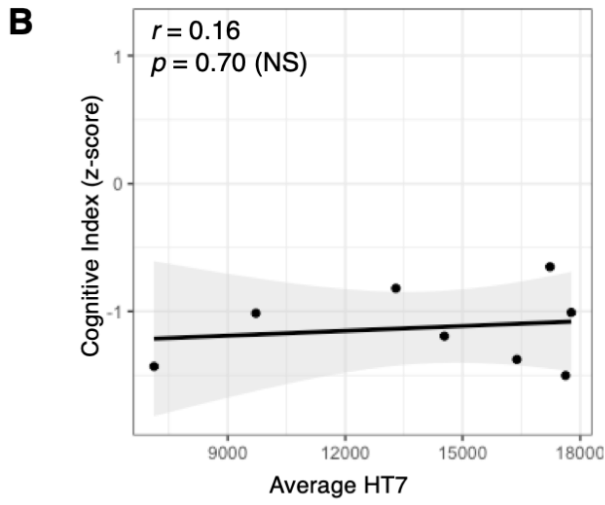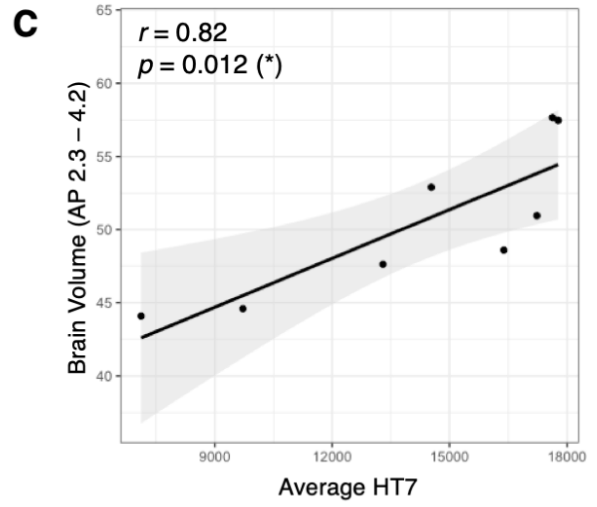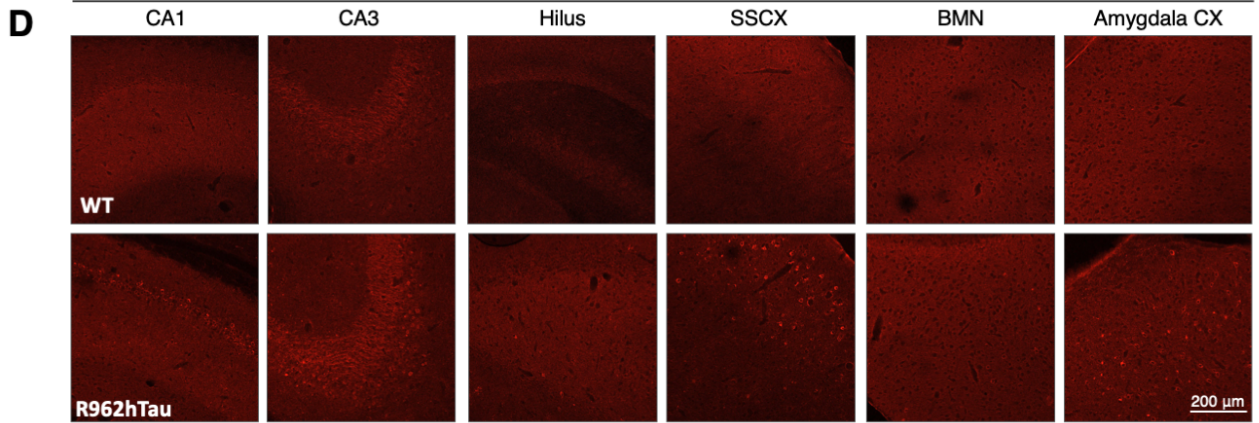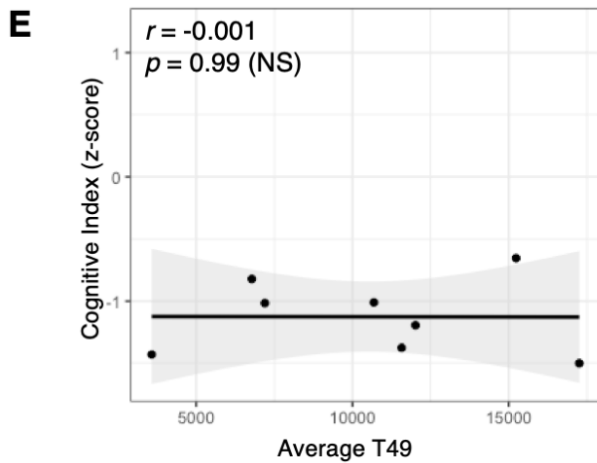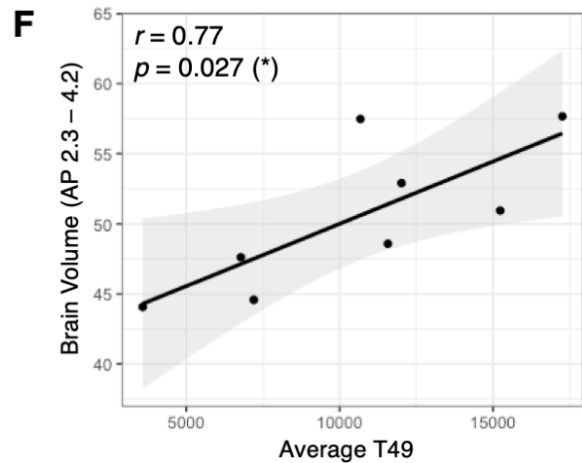



**Supplementary Figure 11.** *Correlation analysis of tau levels with neurodegeneration and behaviour*

Examples of confocal immunofluorescent images used to calculate average levels of human tau (HT7) across regions of interest [CA1, CA3, Hilus, amygdala cortex (Amygdala CX), basomedial nuclei (BMN) and somatosensory cortex (SSCX)] with rats displaying high (top) and low (bottom) levels of human tau (A). Total immunofluorescent levels of human tau, ascertained by analysis with ImageJ, did not correlate with overall cognitive performance calculated as the cognitive index  $z$ -score generated from behavioural tasks (B). Human tau levels positively correlate with neurodegeneration (C). Representative confocal images of endogenous tau (T49) levels from WT (top) and 962-hTau rats (D). As with human tau, average endogenous tau levels across regions of interest did not correlate with cognitive index (E), but positively correlated with regional brain volume (F). Pearson's correlation was used to analyse the association between variables.  $n = 8$  R962-hTau; \*  $p < 0.05$ , not significant (NS).
